# Supplementary material
Source: PubMed Central journal article supplement (PMC3530689)
Supplement: supp_JCO.2012.41.8996_Supplementary_Tables.pdf [file supp_JCO.2012.41.8996_Supplementary_Tables.pdf]

Table S1: Factors included in variable selection procedure for relative risk models.

| Variable                                                | Type        | Which models | Cohort only |
|---------------------------------------------------------|-------------|--------------|-------------|
| Gender                                                  | Categorical | M1,M2,M3     | No          |
| Race (White, Other)                                     | Categorical | M1,M2,M3     | Yes         |
| Body mass index                                         | Continuous  | M1,M2,M3     | Yes         |
| Type of first cancer (9 types)                          | Categorical | M1,M2,M3     | No          |
| Birth year after 1970                                   | Categorical | M1,M2,M3     | No          |
| Age at FPC diagnosis <15                                | Categorical | M1,M2,M3     | No          |
| Medical visits                                          | Continuous  | M1,M2,M3     | Yes         |
| Smoking status                                          | Categorical | M1,M2,M3     | Yes         |
| Thyroid medication                                      | Categorical | M1,M2,M3     | Yes         |
| Thyroid conditions (4 types)                            | Categorical | M1,M2,M3     | Yes         |
| Thyroid nodules                                         | Categorical | M1,M2,M3     | Yes         |
| Hormonal conditions (3 types)                           | Categorical | M1,M2,M3     | Yes         |
| Reproductive conditions (3 types)                       | Categorical | M1,M2,M3     | Yes         |
| Family history of cancer (4 types)                      | Categorical | M1,M2,M3     | Yes         |
| Radiation for FPC                                       | Categorical | M2,M3        | No          |
| Body regions irradiated in treating FPC (11 regions)    | Categorical | M2, M3       | Yes         |
| Chemotherapy for FPC (6 types)                          | Categorical | M2,M3        | No          |
| Reconstructed radiation dose to thyroid in treating FPC | Continuous  | M3           | No          |

FPC, first primary cancer

Table S2: Number (%) of differentiated subtypes of second primary thyroid cancer.

| Subtype     | CCSS (n=124) | LESG (n=22) | Nordic (n=13) | CCSS-France (n=39) |
|-------------|--------------|-------------|---------------|--------------------|
| Papillary   | 103 (83)     | 19 (86)     | 9 (69)        | 34 (87)            |
| Follicular  | 13 (10.5)    | 3 (14)      | 3 (23)        | 2 (5)              |
| Unspecified | 7 (5.6)      | 0           | 0             | 0                  |
| Other       | 1 (0.9)      | 0           | 1 (8)         | 3 (8)              |

Table S3: Multivariable-adjusted relative risks (95% CI) for second primary thyroid cancer competing events (minimum time to other second primary cancer, thyroid removal, or death) [n=12150, event=2483].

| Risk factor                                | M1                | M2                | M3                |
|--------------------------------------------|-------------------|-------------------|-------------------|
| Birth year after 1970                      | 0.70 (0.61, 0.76) | 0.74 (0.66, 0.82) | 0.73 (0.66, 0.82) |
| Age at FPC < 15 years                      | 0.84 (0.76, 0.95) | 0.81 (0.73, 0.90) | 0.81 (0.73, 0.90) |
| Hodgkin lymphoma FPC                       | 1.74 (1.57, 1.92) |                   |                   |
| Female                                     | 0.99 (0.93, 1.09) | 1.04 (0.96, 1.13) | 1.04 (0.96, 1.13) |
| Thyroid nodules (in lifetime) <sup>a</sup> | 1.69 (1.33, 2.15) | 1.44 (1.13, 1.83) | 1.45 (1.14, 1.85) |
| Any alkylating agent for FPC <sup>b</sup>  |                   | 1.60 (1.48, 1.74) | 1.65 (1.52, 1.80) |
| Any radiation for FPC <sup>b</sup>         |                   | 2.06 (1.82, 2.32) | 2.27 (2.02, 2.54) |
| Radiation to neck <sup>b</sup>             |                   | 1.77 (1.62, 1.94) |                   |
| Radiation > 20 Gray                        |                   |                   | 1.62 (1.47, 1.78) |

FPC, first primary cancer

a Self-reported 'Yes'; 12-month incident nodule diagnoses excluded

b Within 10 years of FPC

Table S4: Pooled multivariable-adjusted relative risk estimates (95% CI) for M1 with multiple imputation for missing data<sup>†</sup> compared to estimated in the CCSS cohort only.

| Risk factor                                | Pooled (CCSS, LESG, Nordic) <sup>§</sup> | CCSS only           |
|--------------------------------------------|------------------------------------------|---------------------|
| Birth year after 1970                      | 1.54 (1.00, 2.37)                        | 1.50 (0.98, 2.30)   |
| Age at FPC < 15 years                      | 2.78 (1.53, 5.06)                        | 2.93 (1.49, 5.41)   |
| Hodgkin lymphoma FPC                       | 2.58 (1.71, 3.91)                        | 2.52 (1.62, 3.92)   |
| Female                                     | 1.99 (1.39, 2.86)                        | 2.11 (1.43, 3.12)   |
| Thyroid nodules (in lifetime) <sup>a</sup> | 10.81 (6.51, 17.98)                      | 11.06 (6.79, 18.01) |

FPC, first primary cancer

† Thyroid nodules, neck radiation, and birth year (LESG only)

§ Mean and 95% CIs were based on 100 imputed datasets

a Self-reported 'Yes'; 12-month incident nodule diagnoses excluded

Table S5: Pooled multivariable-adjusted relative risk estimates (95% CI) for M2 with multiple imputation for missing data<sup>†</sup> compared to estimated in the CCSS cohort only.

| Risk factor                                | Pooled (CCSS, LESG, Nordic) <sup>§</sup> | CCSS only          |
|--------------------------------------------|------------------------------------------|--------------------|
| Birth year after 1970                      | 1.67 (1.05, 2.64)                        | 1.69 (1.12, 2.56)  |
| Age at FPC < 15 years                      | 3.17 (1.63, 6.16)                        | 3.05 (1.66, 5.59)  |
| Female                                     | 2.28 (1.56, 3.32)                        | 2.32 (1.57, 3.42)  |
| Thyroid nodules (in lifetime) <sup>a</sup> | 6.83 (4.06, 11.48)                       | 7.05 (4.39, 11.33) |
| Any alkylating agent for FPC <sup>b</sup>  | 1.56 (1.07, 2.28)                        | 1.63 (1.11, 2.38)  |
| Any radiation for FPC <sup>b</sup>         | 1.92 (0.92, 4.02)                        | 1.39 (0.70, 2.79)  |
| Radiation to neck <sup>b</sup>             | 5.57 (3.33, 9.33)                        | 6.03 (3.76, 9.68)  |

FPC, first primary cancer

† Thyroid nodules, neck radiation, and birth year (LESG only)

§ Mean and 95% CIs were based on 100 imputed datasets

a Self-reported 'Yes'; 12-month incident nodule diagnoses excluded

b Within 10 years of FPC

Table S6: Pooled multivariable-adjusted relative risk estimates for (95% CI) M3 with multiple imputation for missing data<sup>†</sup> compared to estimated in the CCSS cohort only.

| Risk factor                                | Pooled (CCSS, LESG, Nordic) <sup>§</sup> | CCSS only               |
|--------------------------------------------|------------------------------------------|-------------------------|
| Birth year after 1970                      | 1.77 (1.08, 2.90)                        | 1.68 (1.07, 2.63)       |
| Female                                     | 2.12 (1.34, 3.37)                        | 2.26 (1.60, 3.19)       |
| Thyroid nodules (in lifetime) <sup>a</sup> | 8.22 (4.59, 14.74)                       | 7.89 (4.77, 13.03)      |
| Any alkylating agent for FPC <sup>b</sup>  | 1.49 (1.08, 2.06)                        | 1.56 (1.01, 2.39)       |
| Radiation dose (linear term)               |                                          |                         |
| By age at FPC                              |                                          |                         |
| < 5 years                                  | 1.58 (0.58, 4.32)                        | 1.57 (0.70, 3.59)       |
| 5-9 years                                  | 1.66 (0.85, 3.26)                        | 1.44 (0.54, 3.87)       |
| 10-14 years                                | 2.33 (1.10, 4.94)                        | 1.97 (0.87, 4.46)       |
| ≥ 15 years                                 | 0.87 (0.34, 2.22)                        | 0.48 (0.22, 1.05)       |
| Radiation dose (exp. term)                 | -0.060 (-0.043, -0.085)                  | -0.054 (-0.041, -0.072) |

FPC, first primary cancer

<sup>†</sup> Thyroid nodules, neck radiation, and birth year (LESG only)

<sup>§</sup> Mean and 95% CIs were based on 100 imputed datasets

<sup>a</sup> Self-reported ‘Yes’; 12-month incident nodule diagnoses excluded

<sup>b</sup> Within 10 years of FPC

Table S7: Distribution, No. (%), of reconstructed radiation absorbed dose to thyroid gland in model development (n=12150) and validation (n=2966) data sets.

| Exposure group         | Model development<br>(CCSS, LESG, Nordic) | Validation<br>CCSS-France |
|------------------------|-------------------------------------------|---------------------------|
| None                   | 4020 (33.1)                               | 881 (29.7)                |
| Dose <sup>a</sup> , Gy |                                           |                           |
| < 0.5                  | 2098 (17.3)                               | 892 (30.1)                |
| 0.5-4.99               | 2894 (23.8)                               | 645 (21.7)                |
| 5 - 9.99               | 252 (2.1)                                 | 143 (4.8)                 |
| 10 - 19.99             | 785 (6.5)                                 | 174 (5.9)                 |
| 20 - 39.99             | 1372 (11.3)                               | 188 (6.3)                 |
| 40+                    | 729 (6.0)                                 | 43 (1.4)                  |

<sup>a</sup> a Wilcoxon test p-value of difference between groups < 0.001
